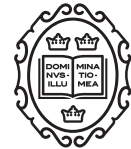

Original Article

## Species of *Aspergillus* section *Aspergillus* from clinical samples in the United States

João P. Z. Siqueira<sup>1,2</sup>, Deanna A. Sutton<sup>3</sup>, Josepa Gené<sup>1,\*</sup>, Dania García<sup>1</sup>, Nathan Wiederhold<sup>3</sup> and Josep Guarro<sup>1</sup>

<sup>1</sup>Unitat de Micologia, Facultat de Medicina i Ciències de la Salut, IISPV, Universitat Rovira i Virgili, Reus, Spain, <sup>2</sup>Laboratório de Microbiologia, Faculdade de Medicina de São José do Rio Preto, 5416 Brigadeiro Faria Lima Ave., 15090-000, São José do Rio Preto, Brazil and <sup>3</sup>Fungus Testing Laboratory, University of Texas Health Science Center, San Antonio, TX, USA

\*To whom correspondence should be addressed. Josepa Gené, PhD, Unitat de Micologia, Facultat de Medicina i Ciències de la Salut, Universitat Rovira i Virgili, C/ Sant Llorenç 21, 43201 Reus, Spain Tel: +34-977-759359; Fax: +34-977-759322; E-mail: [josepa.gene@urv.cat](mailto:josepa.gene@urv.cat)

Received 22 February 2017; Revised 4 July 2017; Accepted 25 August 2017; Editorial Decision 12 July 2017

### Abstract

The diversity of *Aspergillus* species in clinical samples is continuously increasing. Species under the former name *Eurotium*, currently accommodated in section *Aspergillus* of the genus *Aspergillus*, are xerophilic fungi widely found in the human environment and able to grow on substrates with low water activity. However, their prevalence in the clinical setting is poorly known. We have studied the presence of these species in a set of clinical samples from the United States using a multilocus sequence analysis based on the internal transcribed spacer (ITS) region of the rRNA, and fragments of the genes  $\beta$ -tubulin (*BenA*), calmodulin (*CaM*), and polymerase II second largest subunit (*RPB2*). A total of 25 isolates were studied and identified as follows: *A. montevideosis* (44%), *A. chevalieri* (36%), *A. pseudoglaucus* (8%), and *A. costiformis* (4%). A new species *Aspergillus microperforatus* is also proposed, which represented 8% of the isolates studied and is characterized by uniseriate conidial heads, subglobose to pyriform vesicles, rough conidia, globose to subglobose cleistothecia, and lenticular and smooth ascospores. The *in vitro* antifungal activity of eight clinically available antifungals was also determined against these isolates, with the echinocandins and posaconazole having the most potent activity.

**Key words:** *Aspergillus*, phylogenetic analysis, antifungal susceptibility, taxonomy, *Eurotium*.

### Introduction

The number of species of *Aspergillus* involved in human infections is continuously increasing, and most of these species have nowadays been identified using modern molecular techniques. Until recently, the dual nomenclature system permitted different names for the sexual and asex-

ual forms of *Aspergillus*. One such example is the genus *Eurotium*, the name for the sexual state for species in the former *Aspergillus glaucus* group.<sup>1</sup> However, following the recent changes in fungal nomenclature<sup>2,3</sup> and based on phylogenetic studies,<sup>4,5</sup> all generic names for sexual states of *Aspergillus* are now included under the name *Aspergillus*,

and former species of *Eurotium* now comprise the aspergilli in the section *Aspergillus*.<sup>4</sup> A new approach to phylogenetic study supports the current broad concept of the genus *Aspergillus*,<sup>5</sup> with *A. glaucus* (= *E. herbariorum*) being the type species of the genus.

Species in the section *Aspergillus* are usually osmophilic, with optimum growth on substrates with high sugar or salt concentrations. Commonly the asexual morph has smooth conidiophores, with uniseriate, radiate to somewhat columnar conidial heads, and ellipsoidal to globose echinulate conidia.<sup>1,6</sup> The sexual morph is usually characterized by globose to subglobose, thin-walled cleistothecia, eight-spored asci, and lenticular, smooth to rough-walled ascospores, generally showing an equatorial line or furrow.<sup>1,7</sup> These species are found worldwide and often on organic materials, dust, and stored cereals and other food products.<sup>1,7</sup> Although these aspergilli are of minimal clinical importance, some, such as *A. glaucus*, have been reported in orofacial<sup>8</sup> and brain infections.<sup>9</sup> In addition, *A. montevidensis* has been involved in cases of otitis, mycetoma, cerebral abscess, keratitis, and pulmonary infections,<sup>10</sup> and *A. glaucus* and *A. montevidensis* can also cause hypersensitive pneumonitis<sup>11,12</sup>. *Aspergillus chevalieri* and *A. pseudoglaucus* have been linked to cutaneous aspergillosis<sup>13</sup> and maxillary sinusitis,<sup>14</sup> respectively. Hubka et al.<sup>15</sup> recovered five species of section *Aspergillus* among isolates from probable cases of superficial infections (e.g., skin and nails), including *A. montevidensis*, *A. costiformis*, *A. pseudoglaucus*, *A. proliferans*, and *A. ruber* in Czech Republic. The antifungal susceptibility patterns of members of section *Aspergillus* are largely unknown,<sup>16</sup> with little published data. Masih et al.<sup>17</sup> demonstrated potent activity of posaconazole, anidulafungin, and micafungin against three strains of *A. montevidensis* (GM minimal inhibitory concentrations [MICs] of 0.04 µg/ml, 0.015 µg/ml, and 0.015 µg/ml, respectively) and one of *A. chevalieri* (MICs of 0.015 µg/ml, 0.03 µg/ml, and 0.015 µg/ml, respectively). García-Martos et al.<sup>18</sup> also demonstrated low MIC values for amphotericin B, itraconazole, and voriconazole against three strains of *A. glaucus* (MICs of 0.125–0.5 µg/ml, 0.25–0.5 µg/ml, and 0.125–0.25 µg/ml, respectively) and against two strains of *A. chevalieri* (MICs of 0.125–0.5 µg/ml, 0.125–0.25 µg/ml, and 0.125–0.25 µg/ml, respectively). Wildfeuer et al.<sup>19</sup> tested eight strains of *A. glaucus* against four drugs and observed that itraconazole exhibited the most potent activity (GM MIC of 0.39 µg/ml).

In order to assess the diversity of species from *Aspergillus* section *Aspergillus* in the clinical setting and to observe their response to antifungal drugs, the aim of this study was to identify to the species level a set of clinical isolates from the United States using a multilocus phylogenetic study, and

to determine the susceptibility pattern of eight clinically available antifungals against these species.

## Methods

### Fungal isolates

A total of 25 isolates of section *Aspergillus* were investigated in this study. Most of them were from human clinical samples, primarily from the respiratory tract (BAL, sputum, and sinus), but also in fewer numbers from corneas, nails, stool, and lymph nodes. One of them was of environmental origin, and the origin of four were unknown (Table 1). These isolates were received at the Fungus Testing Laboratory of the University of Texas Health Science Center (San Antonio, TX, USA) from different institutions across the United States over a period of 11 years (2004–2015), for identification and/or antifungal susceptibility testing.

### Morphological characterization

The morphology of the fungi was characterized by the traditional criteria.<sup>4,20</sup> Briefly, this is determined after 7 days of incubation on Czapek Yeast Autolysate agar (CYA, Becton, Dickinson and Company®, Sparks, MD, USA), CYA supplemented with 20% sucrose (CY20S), and Malt Extract agar (MEA, Pronadisa®, Madrid, Spain) at 25°C; and CY20S and Harrold's Agar containing 60% sucrose<sup>1</sup> (M60Y) at 37°C. Colors match Kornerup and Wanscher.<sup>21</sup> Microscopic features were examined and measured on MEA and CY20S cultures, after 10–14 days of incubation, on wet mounts with 60% lactic acid and a drop of ethanol 70% to wash out the excess conidia. Photomicrographs were taken with a DeltaPix Infinity X digital camera mounted on a Zeiss Axio Imager M1 light microscope (Zeiss, Oberkochen, Germany), using a Nomarski differential interference contrast and phase contrast optics. Scanning electron microscope (SEM) photographs were taken with a Jeol JSM- 6400 using techniques described previously.<sup>22</sup>

### DNA extraction, amplification, and sequencing

Total genomic DNA was extracted from MEA cultures after 7 days of incubation at 25°C, using the FastDNA® Kit and the FastPrep® Instrument (MP Biomedicals, Irvine CA, USA), according to the manufacturer's specifications. After extraction, four different genetic regions were amplified for each strain<sup>20,23</sup>; that is, the internal transcribed spacer (ITS) region of the rRNA, comprising ITS1, 5.8S gene, and ITS2 regions, using ITS5 and ITS4 primers<sup>24</sup>; a portion of

**Table 1.** Origins, year of isolation, and GenBank/EMBL accession numbers of the *Aspergillus* strains included in this study.

| Species                       | Isolate number   | Origin        | Year | GenBank/EMBL accession number |             |            |             |
|-------------------------------|------------------|---------------|------|-------------------------------|-------------|------------|-------------|
|                               |                  |               |      | ITS                           | <i>BenA</i> | <i>CaM</i> | <i>RPB2</i> |
| <i>A. chevalieri</i> (9)      | UTHSCSA DI15-18  | BAL           | 2014 | LT627247                      | LT627272    | LT627297   | LT627322    |
|                               | UTHSCSA DI16-375 | Sputum        | 2004 | LT627248                      | LT627273    | LT627298   | LT627323    |
|                               | UTHSCSA DI16-381 | BAL           | 2006 | LT627249                      | LT627274    | LT627299   | LT627324    |
|                               | UTHSCSA DI16-382 | BAL           | 2008 | LT627250                      | LT627275    | LT627300   | LT627325    |
|                               | UTHSCSA DI16-394 | BAL           | 2007 | LT627251                      | LT627276    | LT627301   | LT627326    |
|                               | UTHSCSA DI16-396 | Corneal       | 2008 | LT627252                      | LT627277    | LT627302   | LT627327    |
|                               | UTHSCSA DI16-397 | Sinus         | 2008 | LT627253                      | LT627278    | LT627303   | LT627328    |
|                               | UTHSCSA DI16-413 | Unknown       | 2008 | LT627254                      | LT627279    | LT627304   | LT627329    |
|                               | UTHSCSA DI16-414 | Unknown       | 2008 | LT627255                      | LT627280    | LT627305   | LT627330    |
| <i>A. costiformis</i> (1)     | UTHSCSA DI15-16  | Environmental | 2014 | LT627256                      | LT627281    | LT627306   | LT627331    |
| <i>A. microperforatus</i> (2) | UTHSCSA DI16-400 | Toe nail      | 2009 | LT627270                      | LT627295    | LT627320   | LT627345    |
|                               | UTHSCSA DI16-407 | Lymph node    | 2011 | LT627271                      | LT627296    | LT627321   | LT627346    |
| <i>A. montevideensis</i> (11) | UTHSCSA DI15-19  | Ethmoid sinus | 2014 | LT627257                      | LT627282    | LT627307   | LT627332    |
|                               | UTHSCSA DI15-20  | Sputum        | 2014 | LT627258                      | LT627283    | LT627308   | LT627333    |
|                               | UTHSCSA DI15-21  | BAL           | 2015 | LT627259                      | LT627284    | LT627309   | LT627334    |
|                               | UTHSCSA DI15-22  | Sputum        | 2015 | LT627260                      | LT627285    | LT627310   | LT627335    |
|                               | UTHSCSA DI16-401 | Lung tissue   | 2009 | LT627261                      | LT627286    | LT627311   | LT627336    |
|                               | UTHSCSA DI16-403 | Sputum        | 2009 | LT627262                      | LT627287    | LT627312   | LT627337    |
|                               | UTHSCSA DI16-405 | Sinus         | 2010 | LT627263                      | LT627288    | LT627313   | LT627338    |
|                               | UTHSCSA DI16-406 | Lung tissue   | 2010 | LT627264                      | LT627289    | LT627314   | LT627339    |
|                               | UTHSCSA DI16-408 | Paranasal     | 2013 | LT627265                      | LT627290    | LT627315   | LT627340    |
|                               | UTHSCSA DI16-411 | Unknown       | 2008 | LT627266                      | LT627291    | LT627316   | LT627341    |
|                               | UTHSCSA DI16-412 | Unknown       | 2008 | LT627267                      | LT627292    | LT627317   | LT627342    |
| <i>A. pseudoglaucus</i> (2)   | UTHSCSA DI15-17  | Nasal         | 2011 | LT627268                      | LT627293    | LT627318   | LT627343    |
|                               | UTHSCSA DI16-410 | Stool         | 2014 | LT627269                      | LT627294    | LT627319   | LT627344    |

*BenA*,  $\beta$ -tubulin; *CaM*, calmodulin; ITS, internal transcribed spacer regions of the rDNA and 5.8S region; *RPB2*, partial RNA polymerase II second largest subunit; UTHSCSA, University of Texas Health Science Center (San Antonio, USA).

$\beta$ -tubulin gene (*BenA*), using Bt2a and Bt2b primers<sup>25</sup>; a portion of calmodulin gene (*CaM*), using Cmd5 and Cmd6 primers<sup>26</sup>; and a portion of RNA polymerase II second largest subunit gene (*RPB2*), using 5F and 7CR primers.<sup>27</sup> Polymerase chain reaction (PCR) products were sequenced in both directions, using the same primers, at MacroGen Europe (MacroGen Inc., Amsterdam, the Netherlands). Sequences were assembled and edited using SeqMan v.7.0.0 (DNASTAR, Madison, WI, USA).

### Molecular identification and phylogenetic analysis

The phylogeny was analyzed first individually for each partition and then in a concatenated study, once the topologies proved to be congruent. To give support to our analyses, sequences of the ex-type strains of all species of section *Aspergillus* obtained from GenBank were also included, and *A. halophilicus* (section *Restricti*) was used as the outgroup. To increase the robustness of the *A. pseudoglaucus* clade, sequences of 15 other strains of this species were additionally retrieved from GenBank and included in the analyses. A multiple sequence alignment was performed using

ClustalW inside MEGA v.6 software.<sup>28</sup> When necessary, the MUSCLE tool and manual adjustments were used to refine the alignment. Maximum Likelihood (ML) was conducted with MEGA v.6 software, as well as the estimation of the best nucleotide substitution method. Support values of the internal branches were assessed using the Bootstrap method with 1000 replications (values equal or higher than 70% were considered significant). Bayesian inference (BI) was performed using MrBayes v.3.1.2 software.<sup>29</sup> The evolutionary models that best fit each partition were assessed by MrModel Test software.<sup>30</sup> Markov chain Monte Carlo (MCMC) sampling was performed with two simultaneous runs for 1 million generations, with samples taken every 100 generations. The 50% majority rule consensus trees and posterior probability values (pp) were calculated after removing the first 25% of the resulting trees for burn-in. Values of 0.95 or higher were considered significant.

### Antifungal susceptibility testing

The isolates were tested against eight antifungals, following the microdilution broth method.<sup>31</sup> The antifungal agents

tested were: amphotericin B (AMB) (Sigma Aldrich Quimica S.A., Madrid, Spain), itraconazole (ITC) (Jansen Pharmaceuticals, Beerse, Belgium), posaconazole (PSC) (Schering-Plough Res., Inst., Kenilworth, NJ, USA), voriconazole (VRC) (Pfizer S.A., Madrid, Spain), anidulafungin (AFG) (Pfizer S.A., Madrid, Spain), caspofungin (CFG) (Merk & Co., Inc., Rahway, NJ, USA), micafungin (MFG) (Astellas Pharma, Madrid, Spain), and terbinafine (TBF) (Sigma Aldrich Química S.A., Madrid, Spain). Readings were taken after 72 h to allow the strains to grow properly. Strains of *A. pseudoglaucus* (UTHSCSA DI15-17 and UTHSCSA DI16-410) and *A. microperforatus* (UTHSCSA DI16-400 and UTHSCSA DI16-407) were incubated at 30°C, while the others were incubated at 35°C to fit the growth requirements of the isolates under the CLSI protocol. Minimal inhibitory concentration (MIC) was defined as the lowest drug concentration that produced 100% inhibition of visible fungal growth for the AMB and azoles (ITC, PSC, and VRC) and 80% for TBF. For echinocandins (AFG, CFG, and MFG), the minimum effective concentrations (MEC) were determined microscopically as the lowest concentration of drug that allowed the growth of small, rounded, compact hyphal forms, as opposed to the long, unbranched hyphal clusters that are seen in the growth control. *Candida krusei* ATCC 6258 was used as the quality control strain in each test, and the MIC values were within the acceptable MIC range per the CLSI standard. All tests were carried out in duplicate, on different days, for reproducibility. Statistical analyses of the results were performed using the Prism software for Windows v.6.0 (GraphPad Software, San Diego, CA, USA).

### Nucleotide sequence accession numbers and alignments

Newly generated sequences from this study have been deposited in GenBank/EMBL databases under the accession numbers listed on Table 1. The alignments were deposited in TreeBASE (submission number S20583).

## Results

In the present study, as expected, the ITS region was the least informative marker, being unable to discriminate some of the species included in the analysis (Fig. S1 in supplemental material). Two main clades were defined using this genetic marker, one grouping the species *A. chevalieri*, *A. intermedius*, *A. montevidensis*, *A. cristatus*, and *A. costiformis*, and the second one grouping the species *A. pseudoglaucus*, *A. glaucus*, *A. neocarnoyi*, *A. niveoglaucus*, *A. brunneus*, *A. proliferans*, *A. ruber*, *A. appendiculatus*, *A.*

*cibarius*, *A. tonophilus*, and *A. sloanii*. The other markers (*BenA*, *CaM*, and *RPB2*) were more informative, with better delineation in well-supported monophyletic groups (Figs. S2–S4 in supplemental material). The single phylogenetic analysis corresponding to the different genes showed very similar tree topologies, and a concatenated study was performed. The final concatenated sequence alignment consisted of 2,653 bases (ITS, 641; *BenA*, 433; *CaM*, 596; *RPB2*, 983), of which 794 were variable sites (ITS, 105; *BenA*, 176; *CaM*, 255; *RPB2*, 258) and 461 parsimony informative (ITS, 31; *BenA*, 104; *CaM*, 160; *RPB2*, 166). The ML tree (Fig. 1) shows significant support values for both phylogenetic methods (bootstrap/posterior probabilities).

The clinical isolates grouped together with the following species: *A. montevidensis* (11 isolates, 44%), *A. chevalieri* (9 isolates, 36%), and *A. pseudoglaucus* (2 isolates, 8%). The environmental isolate was identified as *A. costiformis* (4%). The isolates UTHSCSA DI16-400 (=CBS 142377) and UTHSCSA DI16-407 (=CBS 142376), from toenail and lymph node samples, respectively, and sequences of two environmental isolates (CCF 5387 and CCF 5388) retrieved from GenBank, formed a full-supported clade close to the *A. pseudoglaucus* clade, which represents an undescribed phylogenetic lineage for the section *Aspergillus*. Therefore, we propose the new species *A. microperforatus*.

The morphology of the isolates shows the expected phenotypic characters that agree with the previous species descriptions.<sup>1,4,32–34</sup> *Aspergillus montevidensis* exhibits rough ascospores, with irregular crests; *A. chevalieri* shows smooth ascospores, with prominent crests; *A. costiformis* is the only species with smooth conidia; and *A. pseudoglaucus* and *A. microperforatus* demonstrated smooth ascospores, with no crests, and rough conidia. In fact, these last two species have a similar morphology, being differentiated by the slow growth and restricted sporulation of the novel species on CYA at 25°C and on M60Y at 37°C and the absence of soluble pigment in any of the culture media tested. *Aspergillus pseudoglaucus* isolates identified here grew and sporulated well on both media and temperatures, and produced a brownish soluble pigment on CYA at 25°C in 14 days of incubation. Table 2 shows the key phenotypic features of the species of genus *Aspergillus* already reported in clinic, including those recovered in this study.

In general, all isolates were inhibited by each of the antifungal drugs tested, with overall geometric mean (GM) values lower than 1.0 µg/ml. The most potent activity was observed with the echinocandins (GM of 0.03 µg/ml), while VRC had the highest MIC values (GM of 1.0 µg/ml for *A. pseudoglaucus*, and 0.77 µg/ml for *A. montevidensis*, with individual values up to 2.0 µg/ml). The results of the *in vitro* susceptibility test are summarized in Table 3.

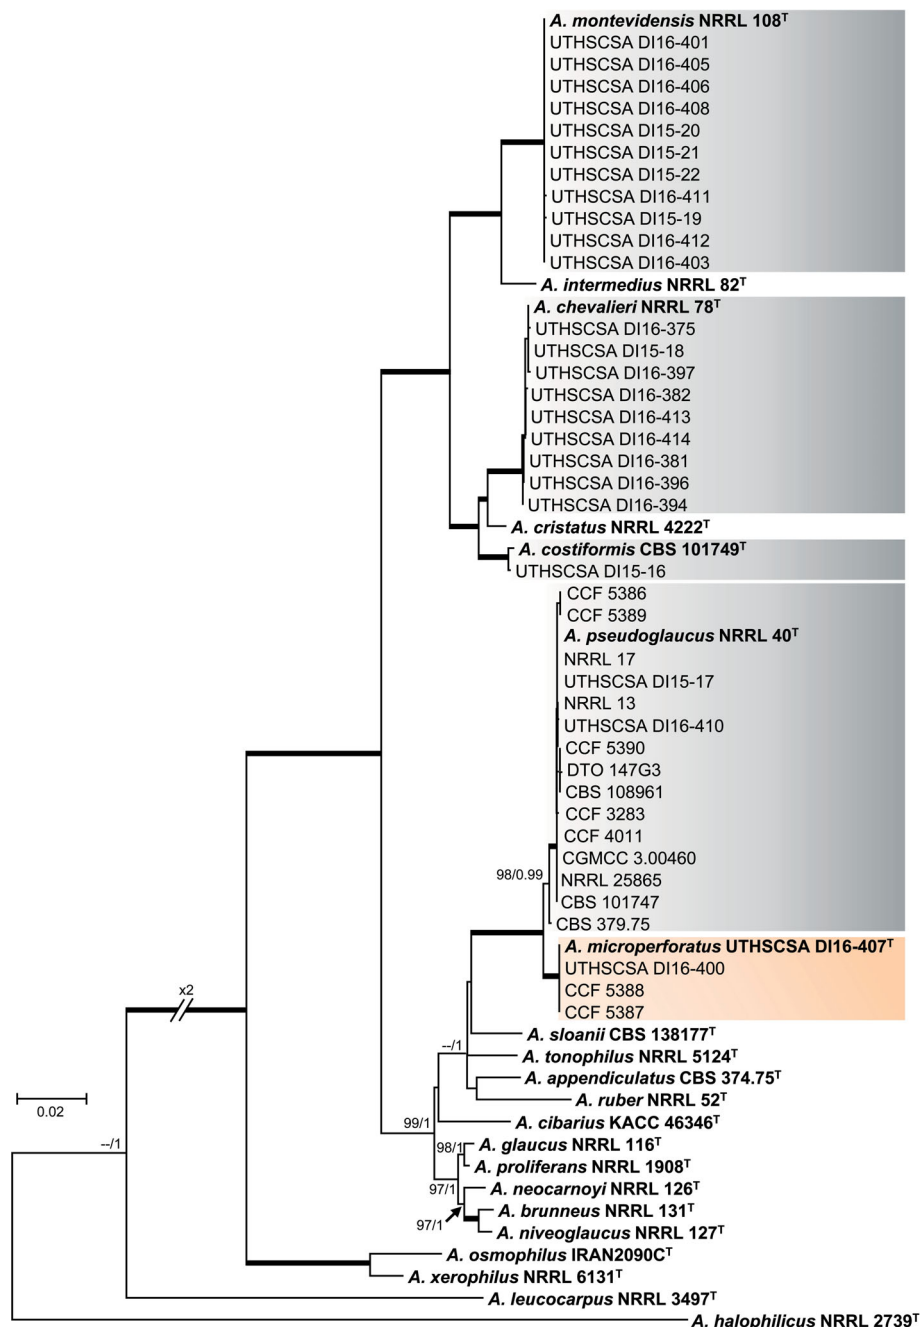

**Figure 1.** Maximum likelihood tree obtained from the combined ITS, *BenA*, *CaM* and *RPB2* sequences of the isolates. Branch lengths are proportional to phylogenetic distance. Bootstrap support values/Bayesian posterior probability scores over 70/0.95 are indicated on the nodes. The fully supported branches (100/1) and type strains are shown in bold. The new species is shown in the colored box. This Figure is reproduced in color in the online version of *Medical Mycology*.

## Taxonomy

### *Aspergillus microperforatus*

J.P.Z. Siqueira, Deanna A. Sutton & Gené, sp. nov. (Mycobank MB 820080, Fig. 2).

Colonies on CYA 8–15 mm diameter in 7 days at 25°C, floccose, yellowish white (3A2) at the center, white toward the periphery, sporulation scarce, margin entire; reverse

pale (2A2) to olive (3A3); exudate and soluble pigment absent. On CY20S, colonies 30–45 mm diameter in 7 days at 25°C, granulose due to the presence of ascomata, sporulation abundant, conidial masse greyish green (25E5); reverse brownish orange (7C5) to olive (3A6) at the center, pale yellow (2A3) to yellow (2A6) toward the periphery; exudate and soluble pigment absent. On MEA, colonies 11 mm diameter in 7 days at 25°C; sporulation absent in

**Table 2.** Relevant features of the genus *Aspergillus* already reported in clinical setting.

| Species                   | Growth rate (mm) at 7d |       |       |        | Ascospores        |                   |               | Conidia           |               | References |
|---------------------------|------------------------|-------|-------|--------|-------------------|-------------------|---------------|-------------------|---------------|------------|
|                           | 25°C                   |       | 37°C  |        | Long axis         | Equatorial region | Ornamentation | Size              | Ornamentation |            |
|                           | CYA                    | CY20S | CY20S | M60Y   | ( $\mu\text{m}$ ) |                   |               | ( $\mu\text{m}$ ) |               |            |
| <i>A. chevalieri</i>      | 16–24                  | 45–65 | 30–49 | 65–>70 | 4.5–6.5           | crests prominent  | smooth        | 3.5–5.5           | rough         | this study |
| <i>A. costiformis</i>     | 18–21                  | 33–38 | 36–39 | >70    | 6–8               | crests irregular  | rough         | 4–8 (12)          | smooth        | this study |
| <i>A. glaucus</i>         | 3–20                   | 30–45 | 0     | 0      | 6–7.5             | crests absent     | smooth        | 4.5–8.5           | rough         | [1, 4]     |
| <i>A. microperforatus</i> | 8–15                   | 40–46 | 0     | 28–32  | 4–5.5             | crests absent     | smooth        | 6–9.5(11)         | rough         | this study |
| <i>A. montevidensis</i>   | 17–21                  | 36–48 | 39–55 | 68–>70 | 3.5–5.5           | crests irregular  | rough         | 4.5–5.5           | rough         | this study |
| <i>A. proliferans</i>     | NA                     | 15–22 | 0     | 0      | 4.5–6             | crests absent     | smooth        | 5–9               | rough         | [1, 4]     |
| <i>A. pseudoglaucus</i>   | 22–24                  | 38–44 | 0     | 41–46  | 3.5–5.5           | crests absent     | smooth        | 7–8.5             | rough         | this study |
| <i>A. ruber</i>           | NA                     | >30   | 0     | NA     | 5–6               | crests absent     | smooth        | 5–7.5             | rough         | [1, 4]     |

CYA, Czapek yeast autolysate agar; CY20S, CYA supplemented with 20% sucrose; MEA, malt extract agar; M60Y, Harrold's agar; NA, not available.

**Table 3.** Results of *in vitro* antifungal susceptibility test for 25 isolates of *Aspergillus* section *Aspergillus*.

| Species (no. of isolates)     | MIC or MEC ( $\mu\text{g/ml}$ ) for: |          |           |      |      |          |           |          |           |
|-------------------------------|--------------------------------------|----------|-----------|------|------|----------|-----------|----------|-----------|
|                               |                                      | AMB      | AFG       | CFG  | MFG  | ITC      | PSC       | VRC      | TBF       |
| <i>A. chevalieri</i> (9)      | GM                                   | 0.14     | 0.03      | 0.03 | 0.03 | 0.24     | 0.03      | 0.37     | 0.09      |
|                               | MIC range                            | 0.06–0.5 | 0.03      | 0.03 | 0.03 | 0.12–1.0 | 0.03      | 0.12–0.5 | 0.03–0.12 |
|                               | Mode                                 | 0.12     | 0.03      | 0.03 | 0.03 | 0.5      | 0.03      | 0.5      | 0.12      |
| <i>A. costiformis</i> (1)     | Values                               | 0.25     | 0.03      | 0.03 | 0.03 | 0.25     | 0.06      | 0.5      | 0.12      |
|                               |                                      |          |           |      |      |          |           |          |           |
| <i>A. microperforatus</i> (2) | GM                                   | 0.03     | 0.03      | 0.03 | 0.03 | 0.12     | 0.03      | 1.0      | 0.06      |
|                               | MIC range                            | 0.03     | 0.03      | 0.03 | 0.03 | 0.12     | 0.03      | 1.0      | 0.06      |
| <i>A. montevidensis</i> (11)  | GM                                   | 0.25     | 0.03      | 0.03 | 0.03 | 0.19     | 0.03      | 0.77     | 0.13      |
|                               | MIC range                            | 0.12–0.5 | 0.03–0.06 | 0.03 | 0.03 | 0.12–0.5 | 0.03–0.06 | 0.5–2.0  | 0.06–0.25 |
|                               | Mode                                 | 0.25     | 0.03      | 0.03 | 0.03 | 0.12     | 0.03      | 0.5      | 0.12      |
|                               | MIC90                                | 0.5      | 0.03      | 0.03 | 0.03 | 0.25     | 0.03      | 1.0      | 0.25      |
| <i>A. pseudoglaucus</i> (2)   | GM                                   | 0.03     | 0.03      | 0.03 | 0.03 | 0.12     | 0.03      | 1.0      | 0.12      |
|                               | MIC range                            | 0.03     | 0.03      | 0.03 | 0.03 | 0.12     | 0.03      | 1.0      | 0.12      |
| Total (25)                    | GM                                   | 0.14     | 0.03      | 0.03 | 0.03 | 0.2      | 0.03      | 0.57     | 0.1       |
|                               | MIC range                            | 0.03–0.5 | 0.03–0.06 | 0.03 | 0.03 | 0.12–1.0 | 0.03–0.06 | 0.12–2.0 | 0.03–0.25 |
|                               | Mode                                 | 0.12     | 0.03      | 0.03 | 0.03 | 0.12     | 0.03      | 0.5      | 0.12      |
|                               | MIC90                                | 0.5      | 0.03      | 0.03 | 0.03 | 0.5      | 0.03      | 1.0      | 0.12      |

AMB, amphotericin B; AFG, anidulafungin; CFG, caspofungin; MFG, micafungin; ITC, itraconazole; PSC, posaconazole; VRC, voriconazole; TBF, terbinafine; MIC, minimum inhibitory concentration; MEC, minimum effective concentration, for AFG, CFG, and MFG; GM, geometric mean.

UTHSCSA DI16–407, abundant in UTHSCSA DI16–400, with conidial masse brown (5A5), margin entire; reverse pale (2A2) to brownish orange (5C3); exudate and soluble pigment absent. On YES, colonies 33–40 mm in 7 days at 25°C, velutinous to downy, slightly granulose at the center due to the presence of ascospores, sporulation abundant, with conidial masse dark green (27F5), margin entire; reverse pale yellow (4A3) to light yellow (4A4). On DG18, colonies 30–45 mm in 7 days at 25°C, fuzzy, white to light orange (5A5), sporulation abundant, conidial mass honey yellow (4D6); reverse light yellow (1A4) to yellow (3A7). On CREA, colonies up to 5 mm in 7 days at 25°C, acid production absent. No growth on OA at 25°C or on CY20S at 37°C.

Conidiophores up to 550  $\mu\text{m}$  long, with uniseriate and radiating conidial heads; stipes occasionally septate, 260–500  $\times$  6.5–9.5  $\mu\text{m}$ , hyaline to subhyaline, smooth to finely roughened; vesicles subglobose to pyriform, 24–36  $\mu\text{m}$  diameter; phialides variable in shape and size, ampulliform to cylindrical, 7–18 (30)  $\times$  2–5  $\mu\text{m}$ ; conidia globose to elongate, sometimes pyriform, 6–9.5(–11)  $\times$  4.5–9  $\mu\text{m}$ , in shades of brown, rough. Cleistothecia globose to subglobose, 90–130  $\mu\text{m}$  diameter, light yellow (2A5) to deep yellow (4A8); asci globose, 10–14  $\mu\text{m}$  in diameter; ascospores lenticular, 4–5.5  $\times$  2.5–4.5  $\mu\text{m}$ , hyaline, with a slight furrow in the equatorial region, convex surface smooth with very small pits only visible under SEM.

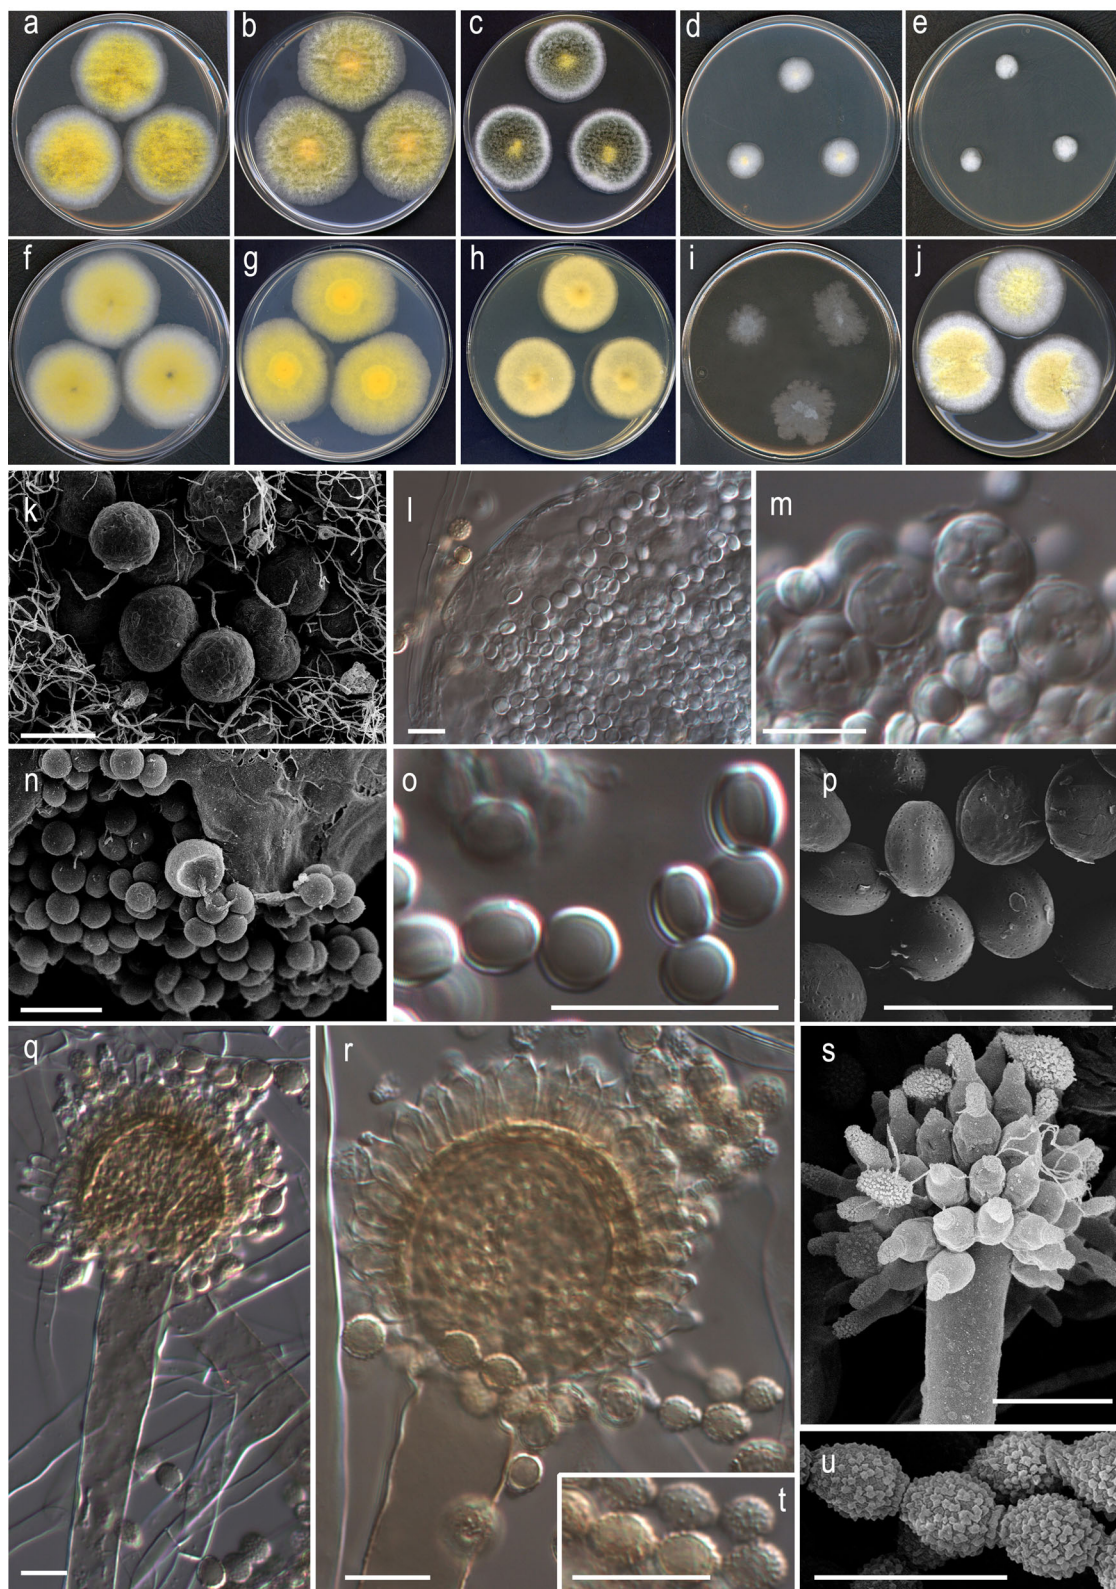

**Figure 2.** Morphological features of *Aspergillus microperforatus* sp. nov. (UTHSCSA DI16-407). Panels: a, b, c, f, g, h, front and reverse of colonies on CY20S, DG18, and YES, respectively, after 7 days at 25°C; d, e, front of colonies on CYA, and MEA, respectively, after 7 days at 25°C; i, front of colonies on M60Y after 7 days at 37°C; j, front of colonies on CYA after 14 days at 25°C; k, l, ascoma; m, n, asci; o, p, ascospores; q, r, s, conidial heads; t, u, conidia. Scale bars: k, 100  $\mu$ m, l–u, 10  $\mu$ m. This Figure is reproduced in color in the online version of *Medical Mycology*.

## Etymology

Referring to the presence of small pits in the ascospore wall under SEM.

## Type

USA, Texas, isolated from human lymph node, D.A. Sutton, 2011 (CBS H-22998 holotype; cultures ex-type: UTHSCSA DI16-407, CBS 142376, FMR 14071).

## Discussion

Although the diversity of genus *Aspergillus* species is well known in osmophilic substrates, house dust, indoor air, or stored products, in the clinical setting it is poorly documented. As previously noted, the taxonomy and nomenclature of the species of section *Aspergillus* has recently changed. In addition to that, recent advances in molecular tools have allowed for the description of new cryptic species that are almost impossible to differentiate using classical morphological tools.<sup>35</sup> Clinically, identification of *Aspergillus* isolates at the species level may be important given that susceptibilities to antifungal drugs vary for different species and that species identity can influence the choice of appropriate antifungal therapy.<sup>36</sup> In the present study, a total of 25 isolates of genus *Aspergillus* were used, most of them being recovered from human respiratory specimens, although further studies are needed to elucidate the role of these fungi as pathogens. Five different species of the section have been identified here, including a novel one (i.e., *A. chevalieri*, *A. costiformis*, *A. microperforatus*, *A. montevidensis* and *A. pseudoglaucus*). To facilitate comparison, their key morphological features are presented in Table 2.

*Aspergillus montevidensis* was the most prevalent (44%). Clinically, this species may be the most relevant pathogen of this group because it has been isolated from different body sites, from superficial to deep tissue infections.<sup>10,15,37</sup> It was first reported and described from a case of human otomycosis.<sup>38</sup> This species currently includes strains that were formerly accepted as different but now considered conspecific. *Aspergillus hollandicus* (incorrectly associated to the sexual state *Eurotium amstelodami*), *A. heterocaryoticus*, and *A. vitis* are all synonyms of *A. montevidensis*, and these names should no longer be used.<sup>4</sup> The nine isolates of *A. montevidensis* in the present study, with the exception of two of unknown origins, were from respiratory specimens (i.e., sputum, sinuses, and lung biopsies).

The second most prevalent species in the present study is *A. chevalieri* (36%), known until recently by its teleomorph name, *Eurotium chevalieri*. This species has been reported from a case of cutaneous aspergillosis<sup>13</sup> and more

recently was the cause of fatal cerebral aspergillosis acquired by traumatic inoculation.<sup>17</sup> It is worth noting that *A. chevalieri* and *A. montevidensis* represent 80% of the isolates included in this study, in fact they are also some of the most commonly species found in indoor environments.<sup>4</sup> These two species, and the others reported here, were able to grow well at 37°C in vitro (Table 2), the basic pathogenic feature that enables them to invade deep tissue.<sup>39</sup>

The isolate of *A. costiformis* identified in this study is the third known strain of this species since its description. It was originally recovered from a mouldy paper-box in China.<sup>34</sup> The second strain was isolated from a human nail in the Czech Republic,<sup>15</sup> and the present study has recovered a third strain from hospital environment. The difficulty in the phenotypic characterization of this species might explain why it is rarely reported. The key characteristic that identifies *A. costiformis* is the presence of smooth conidia (Table 2) and the asexual morph is not usually formed in standard culture conditions. To overcome this problem, the production of conidial heads can be induced on M60Y at 37°C, as previously reported.<sup>4</sup>

The remaining isolates included in this study were genetically and morphologically similar but they could be distinguished as two different species (each representing 8% of the isolates). First, isolates UTHSCSA DI15-17 and UTHSCSA DI16-410 were identified as *A. pseudoglaucus*, a species described by Blochwitz in 1929.<sup>33</sup> This species was more recently delineated phylogenetically by Hubka et al.<sup>4</sup> in whose study other species were shown to be conspecific with *A. pseudoglaucus*, that is, *A. glaucoaffinis*/*E. pseudoglaucum*,<sup>40</sup> *A. glaber*,<sup>40</sup> *A. fimicola*,<sup>41</sup> and *A. reptans*/*E. repens*.<sup>40</sup> The phylogenetic tree constructed in the present study includes sequences of the ex-type strains of synonymous species and of numerous reference strains, giving more support to the *A. pseudoglaucus* clade. Our analysis shows that the genetic similarity among all those strains is 99.9% or higher in the concatenated alignment, in agreement with the proposal mentioned above. *Aspergillus pseudoglaucus* is commonly found in stored products<sup>7</sup> and produces metabolites that are potentially toxic.<sup>42</sup> There are few clinical reports involving *A. pseudoglaucus*; it has been reported from a mixed infection in a case of maxillary sinusitis<sup>14</sup> and occasionally recovered from human skin and nails,<sup>15</sup> although its pathogenicity has not been confirmed. The two isolates of *A. pseudoglaucus* identified in the present study were from nasal and stool samples. Second, the isolates UTHSCSA DI16-400 and UTHSCSA DI16-407, recovered from toenail and lymph node, respectively, and sequences of two isolates retrieved from GenBank group in a clade close to *A. pseudoglaucus*. Although these latter isolates were labelled as *A. pseudoglaucus*, both phylogenetic methods (ML and BI) and the three



most informative markers (*BenA*, *CaM*, and *RPB2*) all show that they represent together with our isolates investigated a distinct lineage in the genus.<sup>4</sup> Thus, they have been proposed as the novel species *A. microperforatus*. The possible role of this species in the clinical disease is yet unknown. Although genus *Aspergillus* includes some species that are closely related, some characteristics can be useful for discriminating *A. microperforatus* (Table 2). For example, the novel species shows restricted growth on CYA at 25°C (up to 15 mm), in contrast to *A. pseudoglaucus* (up to 24 mm), which also differs by growing better on M60Y at 37°C (41 to 46 mm, vs. 28 to 32 mm diameter in *A. microperforatus*) and, according to our results, on CYA at 25°C it produces a diffusible brown pigment that is absent in *A. microperforatus*. The novel species can be differentiated from *A. glaucus* and *A. proliferans* by its ability to grow on M60Y at 37°C and *A. glaucus* has larger ascospores (6.0 to 7.5 µm, vs. 4.0 to 5.5 µm in *A. microperforatus*). Based on the descriptions and other reports, it might be difficult to differentiate the morphologies of *A. microperforatus* and *A. ruber* although the ascospores of *A. ruber* have an evident furrow and the conidia are usually ellipsoidal.<sup>1,4</sup>

Although *A. glaucus* is a known opportunistic pathogen, being reported from many types of infections,<sup>8,9,11</sup> it was not recovered in the present study, as was the case in a study of clinical aspergilli in the Czech Republic.<sup>15</sup> Therefore, it is possible that the clinical prevalence of this species has been overestimated, probably due to the limitations of diagnostic tools for *Aspergillus* identification and for filamentous fungi in general.

The CLSI have established epidemiological cut-off values for triazoles (ITC, VRC, and POS) and AMB for only six *Aspergillus* species, that is, *A. fumigatus*, *A. flavus*, *A. niger*, *A. terreus*, *A. nidulans*, and *A. versicolor*.<sup>43,44</sup> However, the limited number of isolates of other species available in different clinical laboratories precludes the determination of epidemiologic cutoff values, and members of genus *Aspergillus* have only been rarely tested for antifungal susceptibility.<sup>16</sup> With few exceptions, the eight antifungals used in this study showed good activity against the aspergilli tested, with MIC values equal to or less than 1.0 µg/ml (Table 3). Recently, Masih et al.<sup>17</sup> provided the *in vitro* antifungal susceptibility profiles of rare *Aspergillus* species in clinical samples from India. Although they did not test TBF, the MIC values for the other seven antifungals against three isolates of *A. montevidensis* and one strain of *A. chevalieri* were similar to the values observed in the current study. Most available *in vitro* data are with *A. glaucus*. Wildfeuer et al.<sup>21</sup> and García-Martos et al.<sup>22</sup> include eight and three clinical isolates of *A. glaucus*, respectively, and both reported good activity for ITC (MIC range of 0.25–0.5 µg/ml), VRC (0.125–0.78 µg/ml), and

AMB (0.125–1.56 µg/ml). Although we did not study any *A. glaucus* strains, these values are similar to the overall values observed for the strains tested here. However, our MIC values were slightly lower for AMB and higher for VRC. Furthermore, García-Martos et al.<sup>21</sup> also included two isolates of *A. chevalieri* and report the same MIC range (0.125–0.25 µg/ml) for ITC, VRC, and AMB. These results are very similar to those found in our *A. chevalieri* isolates, with the exception of one isolate that had an ITC MIC of 1.0 µg/ml.

In summary, this study has assessed the species diversity of genus *Aspergillus* from a set of clinical isolates from the United States and demonstrated that *A. montevidensis* and *A. chevalieri* were the most frequently identified species. We also describe *A. microperforatus* as a new species. The antifungals tested showed potent activity against these isolates, especially the echinocandins and PSC.

## Supplementary material

Supplementary data are available at [MMYCOL](https://academic.oup.com/mmy/article/56/5/541/4372452) online.

## Acknowledgments

This study was supported by the Spanish Ministerio de Economía y Competitividad, grant CGL2013-43789-P and by CAPES (Coordenação de Aperfeiçoamento de Pessoal de Nível Superior, Brasil), grant BEX 0623/14-8.

## Declaration of interest

The authors report no conflicts of interest. The authors alone are responsible for the content and the writing of the paper.

## References

- Raper KB, Fennell DI. *The Genus Aspergillus*. Huntington, NY: Robert E. Krieger Publishing Co., Inc.; 1965.
- McNeill J, Barrie FF, Buck WR et al. *International Code of Nomenclature for Algae, Fungi and Plants (Melbourne Code)*. Oberreifenberg: Koeltz Scientific Books; 2012.
- Norvell LL. Melbourne approves a new code. *Mycotaxon*. 2011; 116 (1): 481–490.
- Hubka V, Kolarik M, Kubatova A, Peterson SW. Taxonomic revision of *Eurotium* and transfer of species to *Aspergillus*. *Mycologia*. 2013; 105 (4): 912–937.
- Kocsubé S, Perrone G, Magistà D et al. *Aspergillus* is monophyletic: evidence from multiple gene phylogenies and extrolites profiles. *Stud Mycol*. 2016; 85: 199–213.
- Thom C, Church MB. *The Aspergilli*. Baltimore, MD: Williams & Wilkins; 1926.
- Kozakiewicz Z. *Aspergillus Species on Stored Products*. Ferry Lane, Surrey: C.A.B. International; 1989.
- Dreizen S, Bodey GP, McCredie KB, Keating MJ. Orofacial aspergillosis in acute leukemia. *Oral Surgery, Oral Med Oral Pathol*. 1985; 59 (5): 499–504.
- Traboulsi RS, Kattar MM, Dbouni O, Araj GF, Kanj SS. Fatal brain infection caused by *Aspergillus glaucus* in an immunocompetent patient identified by sequencing of the ribosomal 18S-28S internal transcribed spacer. *Eur J Clin Microbiol Infect Dis*. 2007; 26 (10): 747–750.

10. de Hoog GS, Guarro J, Gené J, Figueras M. *Atlas of Clinical Fungi*. CD-ROM version 3.1, CBS-KNAW fungal biodiversity centre, Utrecht; 2011.
11. Kaukonen K, Savolainen J, Viander M, Kotimaa M, Terho EO. IgG and IgA subclass antibodies against *Aspergillus umbrosus* in farmer's lung disease. *Clin Exp Allergy*. 1993; 23 (10): 851–856.
12. Reboux G, Piarroux R, Mauny F et al. Role of molds in farmer's lung disease in eastern France. *Am J Respir Crit Care Med*. 2001; 163 (7): 1534–1539.
13. Naidu J, Singh SM. *Aspergillus chevalieri* (Mangin) Thom and Church: a new opportunistic pathogen of human cutaneous aspergillosis. *Mycoses*. 1994; 37 (7–8): 271–274.
14. Aznar C, de Bievre C, Guiguen C. Maxillary sinusitis from *Microascus cinereus* and *Aspergillus repens*. *Mycopathologia*. 1989; 105 (2): 93–97.
15. Hubka V, Kubatova A, Mallatova N et al. Rare and new etiological agents revealed among 178 clinical *Aspergillus* strains obtained from Czech patients and characterized by molecular sequencing. *Med Mycol*. 2012; 50 (6): 601–610.
16. Buzina W. *Aspergillus*—Classification and antifungal susceptibilities. *Curr Pharm Des*. 2013; 19 (20): 3615–3628.
17. Masih A, Singh PK, Kathuria S, Agarwal K. Identification by molecular methods and matrix-assisted laser desorption ionization – time of flight mass spectrometry and antifungal susceptibility profiles of clinically significant rare *Aspergillus* species in a referral chest hospital in Delhi, India. *J Clin Microbiol*. 2016; 54 (9): 2354–2364.
18. García-Martos P, García-Agudo L, Gutiérrez-Calzada J, Ruiz-Aragón J, Saldarreja A, Marín P. Actividad in vitro de anfotericina B, itraconazol y voriconazol frente a 20 especies de *Aspergillus* empleando el método de microdilución Sensititre®. *Enferm Infecc Microbiol Clin*. 2005; 23 (1): 15–18.
19. Wildfeuer A, Seidl HP, Paule I, Haberleiter A. In vitro evaluation of voriconazole against clinical isolates of yeasts, moulds and dermatophytes in comparison with itraconazole, ketoconazole, amphotericin B and griseofulvin. *Mycoses*. 1998; 41: 309–319.
20. Samson RA, Visagie CM, Houbaken J et al. Phylogeny, identification and nomenclature of the genus *Aspergillus*. *Stud Mycol*. 2014; 78: 141–173.
21. Kornerup A, Wanscher JH. *Methuen Handbook of Colour*. 3rd edn. Hastings House, New York: Methuen, 1967.
22. Figueras MJ, Guarro J. A scanning electron microscopic study of ascoma development in *Chaetomium malaysiense*. *Mycologia*. 1988; 80 (3): 298–306.
23. Peterson SW. Phylogenetic analysis of *Aspergillus* species using DNA sequences from four loci. *Mycologia*. 2008; 100 (2): 205–226.
24. White T, Bruns T, Lee S, Taylor J. Amplification and direct sequencing of fungal ribosomal RNA genes for phylogenetics. In: Innis MA, Gelfand DH, Sninsky JJ, White TJ, eds. *PCR Protocols: A Guide to Methods and Applications*. New York: Academic Press Inc.; 1990: 315–322.
25. Glass NL, Donaldson GC. Development of primer sets designed for use with the PCR to amplify conserved genes from filamentous ascomycetes. *Appl Environ Microbiol*. 1995; 61 (4): 1323–1330.
26. Hong SB, Go SJ, Shin HD, Frisvad JC, Samson RA. Polyphasic taxonomy of *Aspergillus fumigatus* and related species. *Mycologia*. 2005; 97 (6): 1316–1329.
27. Liu YJ, Whelen S, Hall BD. Phylogenetic relationships among ascomycetes: evidence from an RNA polymerase II subunit. *Mol Biol Evol*. 1999; 16 (12): 1799–1808.
28. Tamura K, Stecher G, Peterson D, Filipski A, Kumar S. MEGA6: molecular evolutionary genetics analysis version 6.0. *Mol Biol Evol*. 2013; 30 (12): 2725–2729.
29. Ronquist F, Huelsenbeck JP. MRBAYES 3: Bayesian phylogenetic inference under mixed models. *Bioinformatics*. 2003; 19: 1572–1574.
30. Nylander JAA. MrModeltest v2. Program distributed by the author. *Evolutionary Biology Centre*, Uppsala University. 2004.
31. Clinical and Laboratory Standards Institute. Reference method for broth dilution antifungals susceptibility testing of conidium-forming filamentous fungi: approved standard, 2nd ed. M38-A2. Wayne, PA: CLSI; 2008.
32. Mangin L. Quest-ce que L'*Aspergillus glaucus*? Etude critique et experimentale des formes groupées sous ce nom. *Ann Sci Nat Bot*. 1909; 9: 303–371.
33. Gattung Blochwitz VA. Die *Aspergillus*. Neue Species. Diagnosen. Synonyme. *Ann Mycol*. 1929; 27 (3–4): 205–240.
34. Kong H, Qi Z. Two new species of *Eurotium* Link. *Acta Mycol Sin*. 1995; 14 (1): 10–16.
35. Alastruey-Izquierdo A, Mellado E, Cuenca-Estrella M. Current section and species complex concepts in *Aspergillus*: recommendations for routine daily practice. *Ann N Y Acad Sci*. 2012; 1273: 18–24.
36. Balajee SA, Houbaken J, Verweij PE et al. *Aspergillus* species identification in the clinical setting. *Stud Mycol*. 2007; 59: 39–46.
37. Marr KA, Patterson T, Denning D. Aspergillosis: pathogenesis, clinical manifestations, and therapy. *Infect Dis Clin North Am*. 2002; 16 (4): 875–894.
38. Talice R V., MaKinnon JE. *Aspergillus (Eurotium) montevidensis*, n. sp. isolé d'un cas d'otomycose chez l'homme. *Compt Rend Soc Biol*. 1931; 108: 1007–1009.
39. Kobayashi GS. Disease of mechanisms of fungi. In: Baron S, ed. *Medical Microbiology*. 4th ed. Galveston: University of Texas Medical Branch at Galveston; 1996.
40. Samson RA, Gams W. Typification of the species of *Aspergillus* and associated teleomorphs. In: Samson RA, Pitt JI, eds. *Advances in Penicillium and Aspergillus Systematics*. New York: Plenum Press; 1985: 31–54.
41. Kong H, Qi Z. Two new species of *Eurotium* isolated from Xizang (Tibet), China. *Acta Microbiol Pol*. 1995; 14 (2): 86–91.
42. Podojil M, Sedmera P, Vokoun J et al. *Eurotium (Aspergillus) repens* metabolites and their biological activity. *Folia Microbiol (Praba)*. 1978; 23 (6): 438–443.
43. Espinel-Ingroff A, Diekema DJ, Fothergill A et al. Wild-type MIC distributions and epidemiological cutoff values for the triazoles and six *Aspergillus* spp. for the CLSI broth microdilution method (M38-A2 document). *J Clin Microbiol*. 2010; 48 (9): 3251–3257.
44. Espinel-Ingroff A, Cuenca-Estrella M, Fothergill A et al. Wild-type MIC distributions and epidemiological cutoff values for amphotericin b and *Aspergillus* spp. for the CLSI broth microdilution method (M38-A2 document). *Antimicrob Agents Chemother*. 2011; 55 (11): 5150–5154.
